# Supplementary material
Source: publisher figshare collection journal article supplement (https://acs.figshare.com/ndownloader/files/5191888)
Supplement: Supplementary file 1 [file 5191888]

# A Novel Vanadium Catalyzed Oxidation of Alcohols to Aldehydes and Ketones under Atmospheric Oxygen

Subbarayan Velusamy and T. Punniyamurthy\*

Department of Chemistry, Indian Institute of Technology Guwahati, Guwahati 781039, India

## Supporting Information

### Experimental Section

**General.** Starting materials were purchased from Aldrich, Fluka and Lancaster and used without further treatment.  $V_2O_5$  (99% purity with yellow to rust brown powder) was obtained from CDH (P) Ltd, Bombay. NMR spectra were recorded on DRX-300 (300 MHz for  $^1H$  and 75.5 MHz for  $^{13}C$ ) spectrophotometer using  $CDCl_3$  as a solvent and  $Me_4Si$  as the internal standard. IR spectra were recorded on Nicolet impact 410 spectrophotometer. GC analysis was performed on HP-6890 series with a FID detector. Column chromatography was performed on silica gel (60-120 mesh) using ethyl acetate (or diethyl ether) and hexane as eluent.

**Oxidation of Primary Alcohols.** A mixture of primary alcohol (2 mmol),  $V_2O_5$  (0.018 g, 5 mol%) and  $K_2CO_3$  (1 mmol) was stirred in toluene (3 ml) at *ca.* 100 °C for the appropriate time under atmospheric oxygen. After removal of the catalyst and  $K_2CO_3$  by filtration, the filtrate was analyzed by GC and then passed through a short pad of silica gel using ethyl acetate and hexane as eluent or distilled to afford the analytically pure aldehydes.

**Oxidation of Secondary Alcohols.** The oxidation of secondary alcohols to ketones was performed as above in the absence of  $K_2CO_3$ .

All products were commercially available and identified by comparison of the isolated products with authentic samples.

**Benzil.** According to the general procedure benzoin gave 399 mg (95%) of the product as a yellow solid after column chromatography (ethyl acetate/hexane=1:19). M.p. 95 °C;  $^1H$  NMR ( $CDCl_3$ , 300 MHz)  $\delta$  7.8-8.0

(m, 4H), 7.6-7.7 (m, 2H), 7.3-7.5 (m, 4H);  $^{13}\text{C}$  NMR ( $\text{CDCl}_3$ , 75.5 MHz)  $\delta$  195.1, 135.4, 133.6, 130.4, 129.6; IR (KBr)  $1671\text{ cm}^{-1}$ .

**Benzyl benzoate.** According to the general procedure benzyl alcohol gave 206 mg (97%) of the product as a colorless liquid after column chromatography (ethyl acetate/hexane=1:19).  $^1\text{H}$  NMR ( $\text{CDCl}_3$ , 300 MHz)  $\delta$  8.0-8.2 (m, 2H), 7.3-7.6 (m, 8H), 5.4 (s, 2H);  $^{13}\text{C}$  NMR ( $\text{CDCl}_3$ , 75.5 MHz)  $\delta$  166.3, 136.0, 132.9, 130.1, 129.6, 128.5, 128.3, 128.2, 128.1, 66.6; IR (neat)  $1719\text{ cm}^{-1}$ .

**Benzaldehyde.** The oxidation was performed as described in the general procedure using 540 mg (5 mmol) of benzyl alcohol and the product was obtained 398 mg (75%) as a colorless liquid after distillation.  $^1\text{H}$  NMR ( $\text{CDCl}_3$ , 300 MHz)  $\delta$  10.2 (s, 1H), 7.5-7.9 (m, 5H);  $^{13}\text{C}$  NMR ( $\text{CDCl}_3$ , 75.5 MHz)  $\delta$  192.2, 136.5, 134.4, 129.7, 128.9; IR (neat)  $1695\text{ cm}^{-1}$ .

**4-Methoxybenzaldehyde.** According to the general procedure 4-methoxybenzyl alcohol provided 250 mg (92%) of the product as a colorless liquid after chromatography (ethyl acetate/hexane=1:19).  $^1\text{H}$  NMR ( $\text{CDCl}_3$ , 300 MHz)  $\delta$  9.9 (s, 1H), 7.8 (d, 2H,  $J = 8.2\text{ Hz}$ ), 7.0 (d, 2H,  $J = 8.2\text{ Hz}$ ), 3.9 (s, 3H);  $^{13}\text{C}$  NMR ( $\text{CDCl}_3$ , 75.5 MHz)  $\delta$  190.6, 164.6, 131.9, 130.0, 114.3, 55.5; IR (neat)  $1682\text{ cm}^{-1}$ .

**4-Nitrobenzaldehyde.** According to the general procedure 4-nitrobenzyl alcohol provided 238 mg (79%) of the product as a pale yellow solid after chromatography (ethyl acetate/hexane=1:19). M.p.:  $105\text{ }^\circ\text{C}$ ;  $^1\text{H}$  NMR ( $\text{CDCl}_3$ , 300 MHz)  $\delta$  10.3 (s, 1H), 8.3 (d, 2H,  $J = 8.3\text{ Hz}$ ), 8.0 (d, 2H,  $J = 8.3\text{ Hz}$ );  $^{13}\text{C}$  NMR ( $\text{CDCl}_3$ , 75.5 MHz)  $\delta$  190.2, 151.1, 140.1, 130.4, 124.3; IR (KBr)  $1678\text{ cm}^{-1}$ .

**3,4,5-Trimethoxybenzaldehyde.** According to the general procedure 3,4,5-trimethoxybenzyl alcohol provided 368 mg (94%) of the product as a pale yellow solid after chromatography (ethyl acetate/hexane=1:9). M.p.  $74\text{ }^\circ\text{C}$ ;  $^1\text{H}$  NMR ( $\text{CDCl}_3$ , 300 MHz)  $\delta$  9.9 (s, 1H), 7.1 (s, 2H), 3.9 (s, 9H);  $^{13}\text{C}$  NMR ( $\text{CDCl}_3$ , 75.5 MHz)  $\delta$  190.9, 153.6, 143.7, 131.7, 106.8, 60.9, 56.3; IR (KBr)  $1682\text{ cm}^{-1}$ .

**Cinnamaldehyde.** According to the general procedure cinnamyl alcohol provided 230 mg (87%) of the product as a yellow liquid after chromatography (diethyl ether/hexane=1:9).  $^1\text{H}$  NMR ( $\text{CDCl}_3$ , 300 MHz)  $\delta$  9.7 (d, 1H,  $J = 7.7$  Hz), 7.4-7.5 (m, 5H), 6.5-6.7 (m, 2H);  $^{13}\text{C}$  NMR ( $\text{CDCl}_3$ , 75.5 MHz)  $\delta$  193.4, 152.6, 133.8, 131.1, 129.0, 128.4, 128.3; IR (neat) 1681  $\text{cm}^{-1}$ .

**Geranial.** According to the general procedure geraniol afforded 246 mg (81%) of the product as a colorless liquid after chromatography (diethyl ether/hexane=1:9).  $^1\text{H}$  NMR ( $\text{CDCl}_3$ , 300 MHz)  $\delta$  9.9 (d, 1H,  $J = 8.1$  Hz), 5.8 (d, 1H,  $J = 8.1$  Hz), 4.8-4.9 (m, 1H), 2.1-2.2 (m, 4H), 1.9 (s, 3H), 1.7 (s, 3H), 1.6 (s, 3H);  $^{13}\text{C}$  NMR ( $\text{CDCl}_3$ , 75.5 MHz)  $\delta$  191.0, 163.5, 132.9, 127.2, 122.4, 40.5, 25.6, 25.5, 17.5, 17.4; IR (neat) 1678  $\text{cm}^{-1}$ .

**Heptanal.** The oxidation was performed as described in the general procedure using 580 mg (5 mmol) of 1-heptanol and the product was obtained 228 mg (40%) as a colorless liquid after distillation.  $^1\text{H}$  NMR ( $\text{CDCl}_3$ , 300 MHz)  $\delta$  9.8 (t, 1H,  $J = 7.3$  Hz), 2.4 (m, 2H), 1.1-1.6 (m, 8H), 0.9 (t, 3H,  $J = 6.0$  Hz);  $^{13}\text{C}$  NMR ( $\text{CDCl}_3$ , 75.5 MHz)  $\delta$  202.7, 43.9, 31.6, 28.8, 22.5, 22.1, 13.9; IR (neat) 1724  $\text{cm}^{-1}$ .

**Decanal.** The oxidation was performed as described in the general procedure using 630 mg (4 mmol) of decanol and the product was obtained in 237 mg (38%) as a colorless liquid after distillation.  $^1\text{H}$  NMR ( $\text{CDCl}_3$ , 300 MHz)  $\delta$  9.9 (t, 1H,  $J = 7.3$  Hz), 2.2-2.4 (m, 2H), 1.2-1.7 (m, 14H), 0.9 (t, 3H,  $J = 6.0$  Hz);  $^{13}\text{C}$  NMR ( $\text{CDCl}_3$ , 75.5 MHz)  $\delta$  202.5, 43.7, 31.7, 29.6, 29.5, 29.4, 29.3, 22.5, 22.1, 14.5; IR (neat) 1716  $\text{cm}^{-1}$ .

**Furfural.** According to the general procedure furfural gave 163 mg (85%) of the product as a colorless liquid after chromatography (diethyl ether/hexane=1:9).  $^1\text{H}$  NMR ( $\text{CDCl}_3$ , 300 MHz)  $\delta$  9.7 (s, 1H), 7.7 (s, 1H), 7.3 (s, 1H), 6.6 (s, 1H);  $^{13}\text{C}$  NMR ( $\text{CDCl}_3$ , 75.5 MHz)  $\delta$  177.8, 152.9, 148.1, 121.1, 112.6; IR (neat) 1681  $\text{cm}^{-1}$ .

**2-Pyridinecarboxaldehyde.** According to the general procedure pyridine-2-methanol gave 171 mg (80%) of the product as a pale yellow liquid after chromatography (ethyl acetate/hexane=1:9).  $^1\text{H}$  NMR ( $\text{CDCl}_3$ , 300 MHz)  $\delta$  10.3 (s, 1H), 8.7-8.8 (m, 1H), 7.8-8.0 (m, 2H), 7.5-7.6(m, 1H);  $^{13}\text{C}$  NMR ( $\text{CDCl}_3$ , 75.5 MHz)  $\delta$  193.3, 152.7, 150.2, 137.0, 127.8, 121.6; IR (neat)  $1716\text{ cm}^{-1}$ .

**Acetophenone.** The oxidation was performed as described in the general procedure using 1.2 g (10 mmol) of 1-phenylethanol and the product was obtained in 1.0 g (85%) as a colorless liquid after distillation.  $^1\text{H}$  NMR ( $\text{CDCl}_3$ , 300 MHz)  $\delta$  7.8-8.0 (m, 2H), 7.3-7.6 (m, 3H), 2.6 (s, 3H);  $^{13}\text{C}$  NMR ( $\text{CDCl}_3$ , 75.5 MHz)  $\delta$  197.9, 137.2, 133.0, 128.5, 128.2, 26.5; IR (film)  $1683\text{ cm}^{-1}$ .

**Benzophenone.** According to the general procedure diphenylmethanol gave 343 mg (94%) of the product as a colorless solid after chromatography (diethyl ether/hexane=1:9). M.p.:  $48\text{ }^\circ\text{C}$ ;  $^1\text{H}$  NMR ( $\text{CDCl}_3$ , 300 MHz)  $\delta$  7.7-7.8 (m, 4H), 7.4-7.6 (m, 6H);  $^{13}\text{C}$  NMR ( $\text{CDCl}_3$ , 75.5 MHz)  $\delta$  196.6, 137.5, 132.3, 129.9, 128.2; IR (KBr)  $1661\text{ cm}^{-1}$ .

**Cyclohexanone.** The oxidation was performed as described in the general procedure using 990 mg (10 mmol) of cyclohexanol and the product was obtained in 735 mg (75%) as a colorless liquid after distillation.  $^1\text{H}$  NMR ( $\text{CDCl}_3$ , 300 MHz)  $\delta$  2.3-2.4 (m, 4H), 1.7-1.9 (m, 6H);  $^{13}\text{C}$  NMR ( $\text{CDCl}_3$ , 75.5 MHz)  $\delta$  211.7, 41.9, 27.1, 25.0; IR (neat)  $1717\text{ cm}^{-1}$ .

**(+)-Menthone.** According to the general procedure (+)-menthol gave 238 mg (77%) of the product as a colorless liquid after chromatography (diethyl ether/hexane=1:9).  $^1\text{H}$  NMR ( $\text{CDCl}_3$ , 300 MHz)  $\delta$  2.2-2.4 (m, 1H), 1.7-2.1 (m, 6H), 1.4-1.6 (m, 2H), 0.7-1.0 (m, 9H);  $^{13}\text{C}$  NMR ( $\text{CDCl}_3$ , 75.5 MHz)  $\delta$  212.0, 55.7, 50.8, 35.3, 33.6, 27.8, 25.9, 22.2, 21.1, 18.7; IR (neat)  $1714\text{ cm}^{-1}$ .

**Cyclododecanone.** According to the general procedure cyclododecanol gave 195 mg (81%) of the product as a colorless solid after chromatography (diethyl ether/hexane=1:9). M.p.:  $58\text{ }^\circ\text{C}$ ;  $^1\text{H}$  NMR ( $\text{CDCl}_3$ , 300 MHz)  $\delta$  2.2-2.4 (m, 4H), 1.7-2.1 (s, 4H), 1.2-1.7 (m, 14H); IR (KBr)  $1710\text{ cm}^{-1}$ .
